# Supplementary material for: Incidence of Pediatric Cannabis Exposure Among Children and Teenagers Aged 0 to 19 Years Before and After Medical Marijuana Legalization in Massachusetts
Source: PubMed Central journal article supplement (PMC6704738; doi:10.1001/jamanetworkopen.2019.9456), 2019-08-16
Supplement: jamanetwopen-2-e199456-s001.pdf [file jamanetwopen-2-e199456-s001.pdf]

## Supplementary Online Content

Whitehill JM, Harrington C, Lang CJ, Chary M, Bhutta WA, Burns MM. Incidence of pediatric cannabis exposure among children and teenagers aged 0 to 19 years before and after medical marijuana legalization in Massachusetts. *JAMA Netw Open*. 2019;2(8):e199456. doi:10.1001/jamanetworkopen.2019.9456

**eTable.** Characteristics of Cannabis-Related Calls to the Regional Poison Control Center by Age Group, Massachusetts, 2009-2016

This supplementary material has been provided by the authors to give readers additional information about their work.

**eTable 1.** Characteristics of Cannabis-Related Calls to the Regional Poison Control Center by Age Group, Massachusetts, 2009-2016

|                                            | Age group (years) |        |        |         |          |         |          |        |       |        |
|--------------------------------------------|-------------------|--------|--------|---------|----------|---------|----------|--------|-------|--------|
|                                            | 0 to 4            |        | 5 to 9 |         | 10 to 14 |         | 15 to 19 |        | Total |        |
|                                            | n                 | (%)    | n      | %       | n        | %       | n        | %      | n     | %      |
| <b>Route of exposure</b>                   |                   |        |        |         |          |         |          |        |       |        |
| Inhalation/Nasal                           | 2                 | (9.1)  | 3      | (75.0)  | 8        | (57.1)  | 140      | (78.7) | 153   | (70.2) |
| Ingestion                                  | 19                | (86.4) | 1      | (25.0)  | 6        | (42.9)  | 28       | (15.7) | 54    | (24.8) |
| Inhalation/Nasal/Ingestion                 | 0                 | 0.0    | 0      | 0.0     | 0        | 0.0     | 2        | (1.1)  | 2     | (0.9)  |
| Rectal                                     | 0                 | 0.0    | 0      | 0.0     | 0        | 0.0     | 1        | (0.6)  | 1     | (0.5)  |
| Unknown                                    | 1                 | (4.5)  | 0      | 0.0     | 0        | 0.0     | 7        | (3.9)  | 8     | (3.7)  |
| <b>Medical Outcome</b>                     |                   |        |        |         |          |         |          |        |       |        |
| Major effect                               | 0                 | 0.0    | 0      | 0.0     | 0        | 0.0     | 4        | (2.2)  | 4     | (1.8)  |
| Moderate effect                            | 4                 | (18.2) | 1      | (25.0)  | 5        | (35.7)  | 90       | (50.6) | 100   | (45.9) |
| Minor effect                               | 4                 | (18.2) | 1      | (25.0)  | 4        | (28.6)  | 45       | (25.3) | 54    | (24.8) |
| No effect                                  | 1                 | (4.5)  | 1      | (25.0)  | 1        | (7.1)   | 8        | (4.5)  | 11    | (5.0)  |
| Unable to follow, judged potentially toxic | 11                | (50.0) | 1      | (25.0)  | 3        | (21.4)  | 24       | (13.5) | 39    | (17.9) |
| Not followed, minimal or unrelated effects | 2                 | (9.1)  | 0      | 0.0     | 1        | (7.1)   | 7        | (3.9)  | 10    | (4.6)  |
| <b>Intent</b>                              |                   |        |        |         |          |         |          |        |       |        |
| Intentional                                | 0                 | 0.0    | 2      | (50.0)  | 12       | (85.7)  | 162      | (91.0) | 176   | (80.7) |
| Unintentional                              | 21                | (95.5) | 2      | (50.0)  | 2        | (14.3)  | 6        | (3.4)  | 31    | (14.2) |
| Other                                      | 1                 | (4.5)  | 0      | 0.0     | 0        | 0.0     | 7        | (3.9)  | 8     | (3.7)  |
| Unknown                                    | 0                 | 0.0    | 0      | 0.0     | 0        | 0.0     | 3        | (1.7)  | 3     | (1.4)  |
| <b>Caller location</b>                     |                   |        |        |         |          |         |          |        |       |        |
| Healthcare Facility                        | 10                | (45.5) | 3      | (75.0)  | 9        | (64.3)  | 150      | (84.3) | 172   | (78.9) |
| Own residence                              | 9                 | (40.9) | 1      | (25.0)  | 5        | (35.7)  | 22       | (12.4) | 37    | (17.0) |
| School                                     | 1                 | (4.5)  | 0      | 0.0     | 0        | 0.0     | 2        | (1.1)  | 3     | (1.4)  |
| Other                                      | 2                 | (9.1)  | 0      | 0.0     | 0        | 0.0     | 4        | (2.2)  | 6     | (2.8)  |
| <b>Exposure site</b>                       |                   |        |        |         |          |         |          |        |       |        |
| Own residence                              | 19                | (86.4) | 4      | (100.0) | 14       | (100.0) | 165      | (92.7) | 202   | (92.7) |
| Other residence                            | 2                 | (9.1)  | 0      | 0.0     | 0        | 0.0     | 2        | (1.1)  | 4     | (1.8)  |
| School                                     | 1                 | (4.5)  | 0      | 0.0     | 0        | 0.0     | 6        | (3.4)  | 7     | (3.2)  |
| Unknown                                    | 0                 | 0.0    | 0      | 0.0     | 0        | 0.0     | 5        | (2.8)  | 5     | (2.3)  |
